# Supplementary material for: Microbial lipid production from crude glycerol and hemicellulosic hydrolysate with oleaginous yeasts
Source: PubMed Central journal article supplement (PMC7953724; doi:10.1186/s13068-021-01916-y), 2021-03-12
Supplement: 13068_2021_1916_MOESM1_ESM.pdf [file 13068_2021_1916_MOESM1_ESM.pdf]

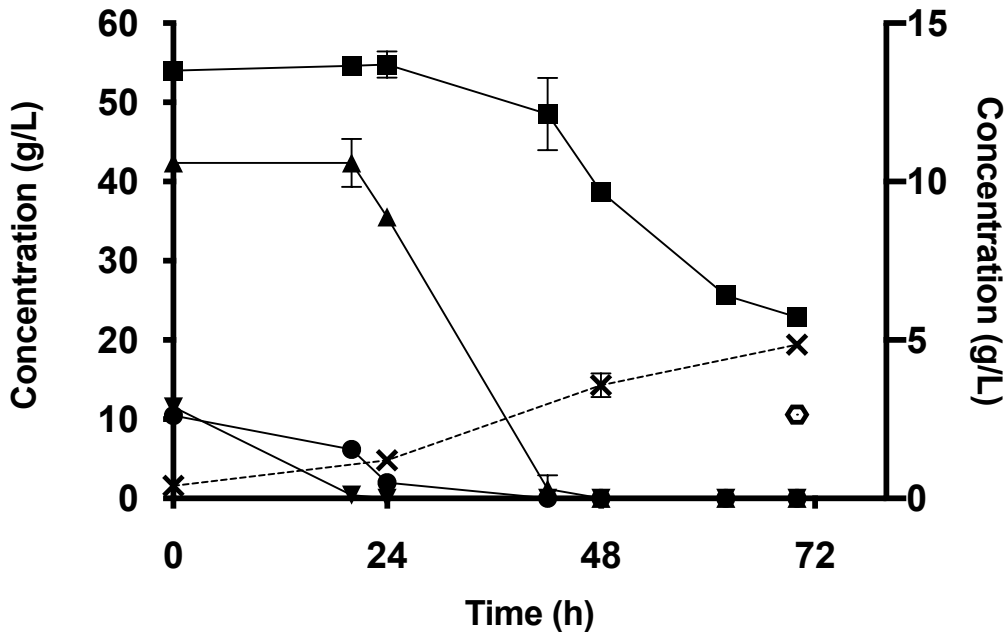

■ Glycerol    ▲ Xylose    ▼ Glucose    ● Acetic acid

○ Lipid concentration    ✕ Dry weight
