# Supplementary material for: Microbial lipid production from crude glycerol and hemicellulosic hydrolysate with oleaginous yeasts
Source: PubMed Central journal article supplement (PMC7953724; doi:10.1186/s13068-021-01916-y), 2021-03-12
Supplement: 13068_2021_1916_MOESM2_ESM.pdf [file 13068_2021_1916_MOESM2_ESM.pdf]

A

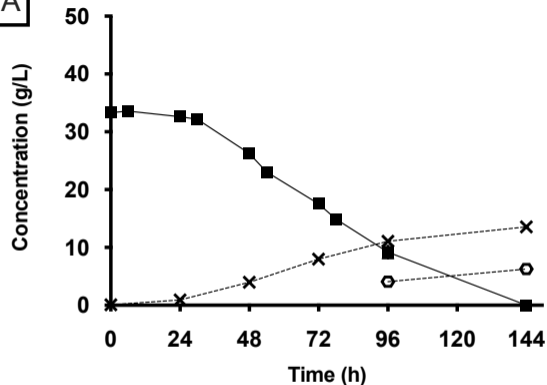

■ Glycerol

-X- Dry weight

▲ Xylose

-◻- Lipid concentration

B

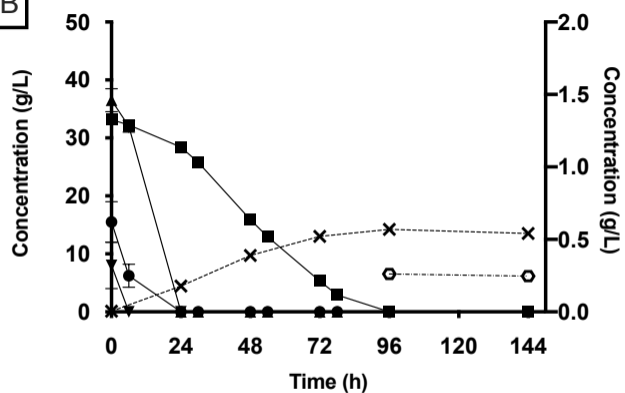

● Acetic acid

Concentration (g/L)
