# Supplementary material for: Microbial lipid production from crude glycerol and hemicellulosic hydrolysate with oleaginous yeasts
Source: PubMed Central journal article supplement (PMC7953724; doi:10.1186/s13068-021-01916-y), 2021-03-12
Supplement: 13068_2021_1916_MOESM3_ESM.pdf [file 13068_2021_1916_MOESM3_ESM.pdf]

Specific lipid production rate (g/(g<sub>dcw</sub>\*h))

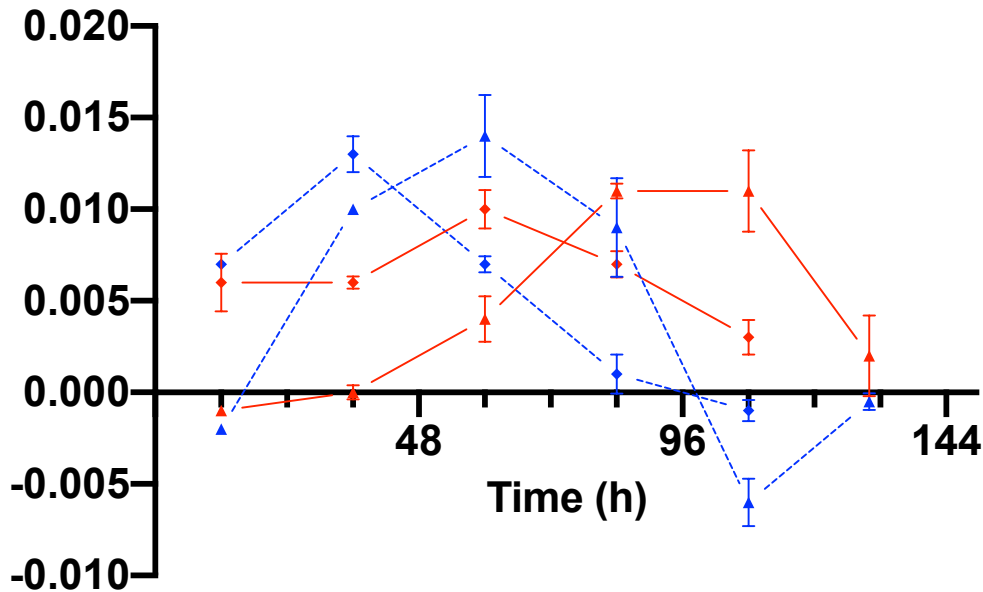

—▲— 55 g/L glycerol *R. toruloides* CBS 14

- -▲- - 55 g/L glycerol + 10% hemicellulose hydrolysate *R. toruloides* CBS 14

—◆— 55 g/L glycerol *R. glutinis* 3044

- -◆- - 55 g/L glycerol + 10% hemicellulose hydrolysate *R. glutinis* 3044
